# Supplementary material for: Carbohydrate Hydrolytic Potential and Redundancy of an Anaerobic Digestion Microbiome Exposed to Acidosis, as Uncovered by Metagenomics
Source: PubMed Central journal article supplement (PMC6643232; doi:10.1128/aem.00895-19), 2019-07-18
Supplement: AEM.00895-19-s0001.pdf [file AEM.00895-19-s0001.pdf]

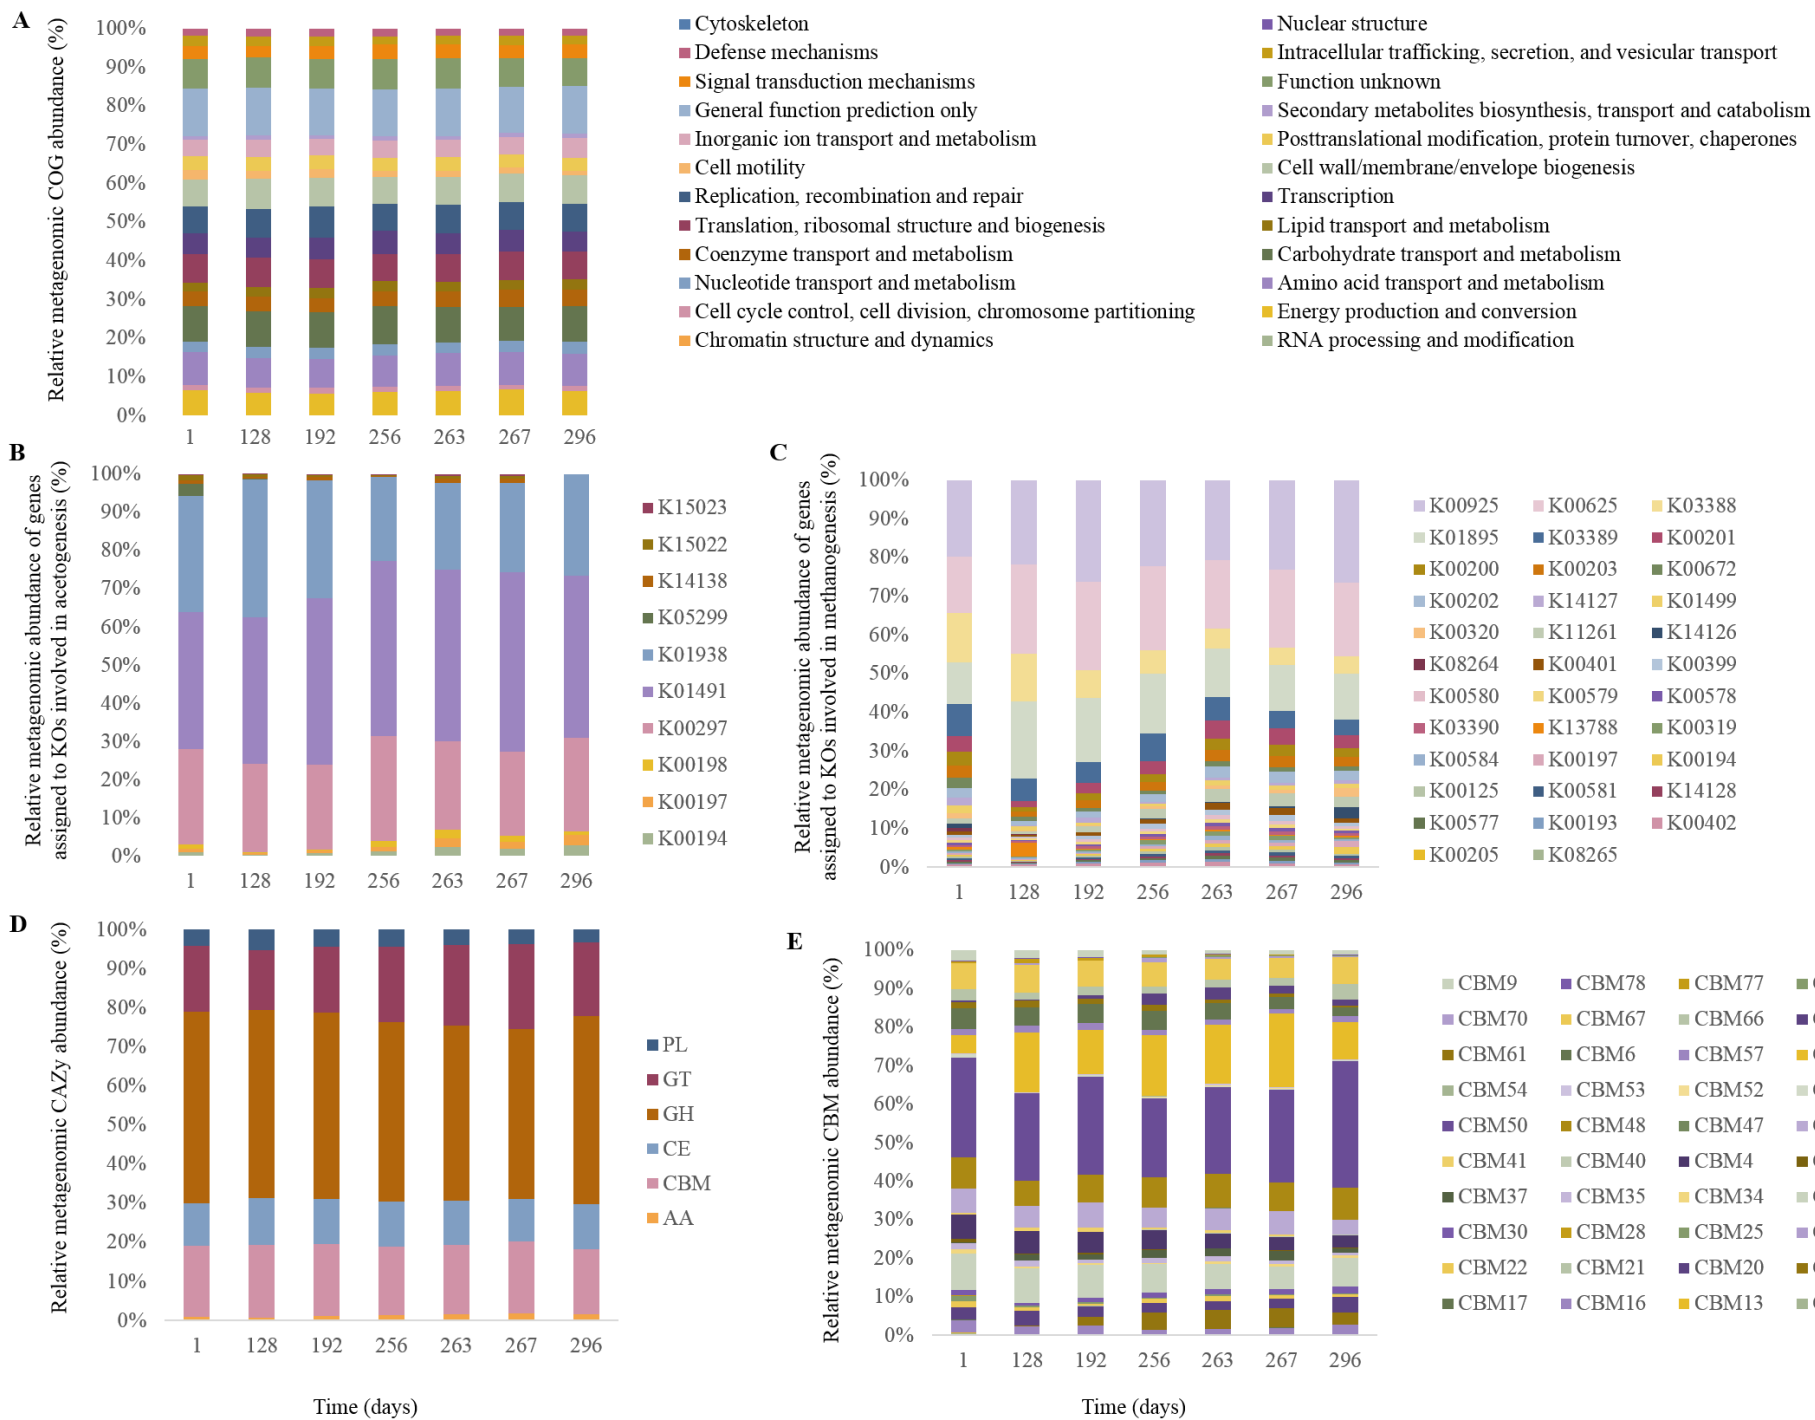

Fig. S1: Metagenomics-assisted characterisation of the functional community potential through the anaerobic digestion (AD) experiment.

(A) Relative metagenomic abundance of the different clusters of orthologous groups (COG) coloured according to the COG group. (B) Relative metagenomic abundance of the different Kyoto Encyclopedia of Genes and Genomes (KEGG) orthology (KO) involved in the acetogenesis pathway coloured according to the KO number. (C) Relative metagenomics abundance of the different KEGGs involved in the methanogenesis (including acetoclastic and hydrogenotrophic pathways) coloured according to the KO number. (D) Relative metagenomic abundance of the different CAZy families coloured according to the CAZy family. The different CAZy families represented are; auxiliary enzyme (AA); Carbohydrate binding module (CBM); Carbohydrate esterase (CE); Glycoside hydrolase (GH); Glycosyltransferase (GT); Polysaccharide lyase (PL). (E) Relative metagenomic abundance of the different CBM families coloured according to the CBM family.

Note: Small variability of the functional profile of genes involved in methanogenesis was related to the overall decrease of genes encoding for the heterodisulfide reductase (hydrogenotrophic pathway) during acidosis.

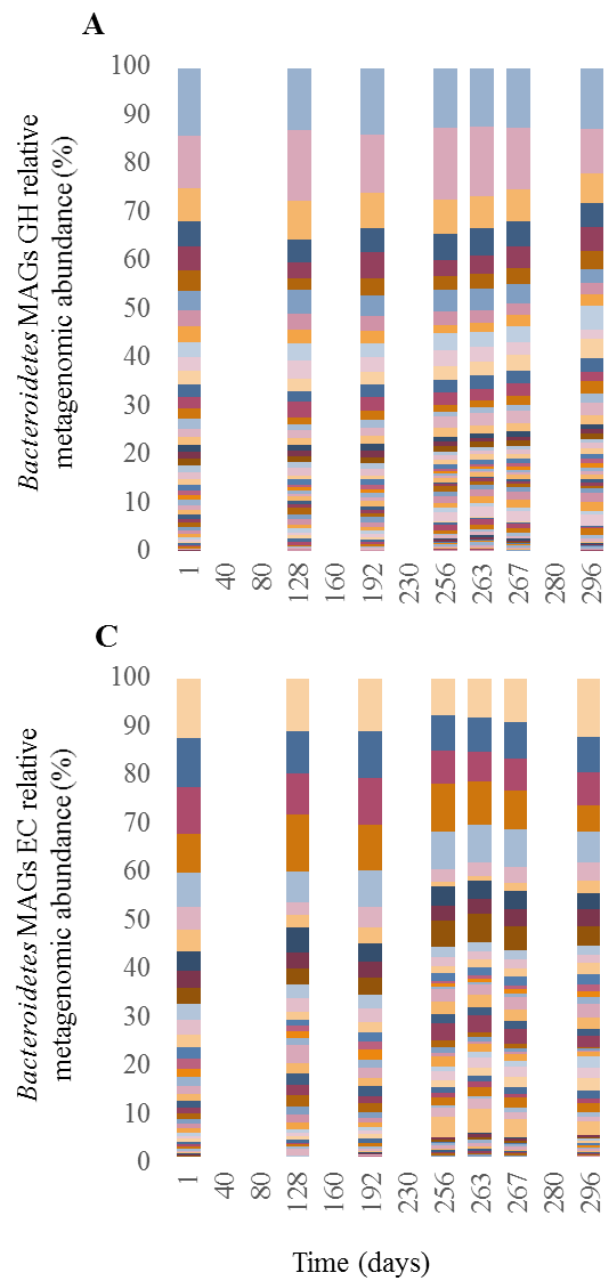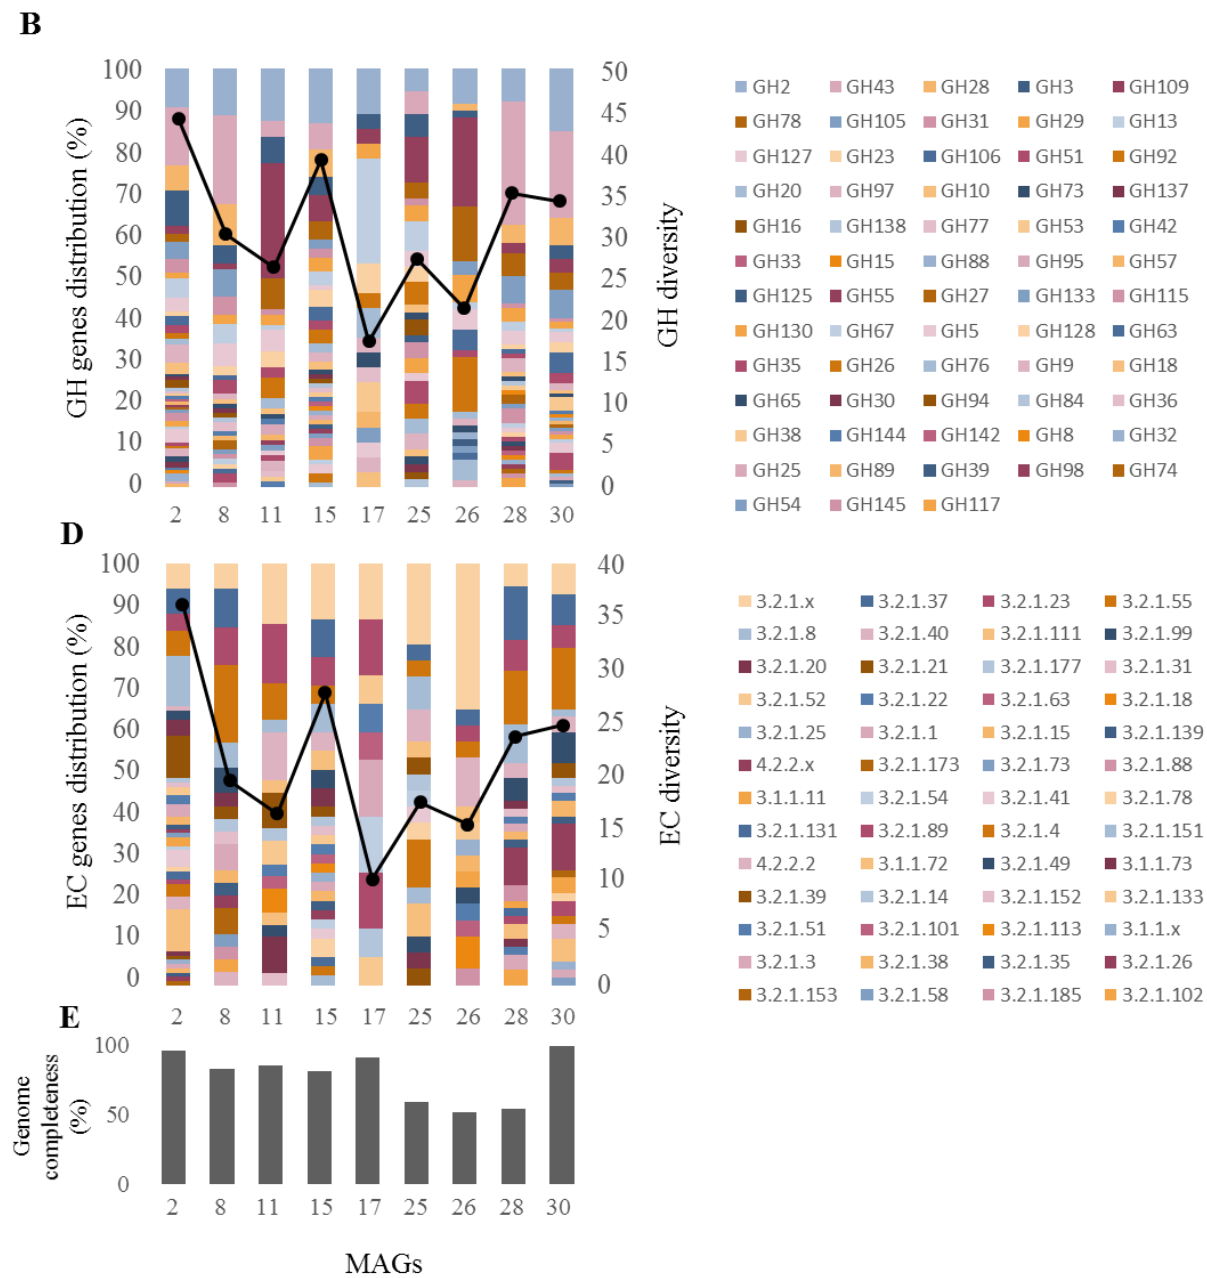

Fig. S2: Metagenomics-assisted characterisation of *Bacteroidetes* MAGs and their carbohydrate hydrolytic potential throughout the anaerobic digestion (AD) experiment. (A) Relative metagenomic abundance of the different GHs coloured according to the assigned GH family and throughout the digestion experiment. (B) Distribution of the annotated GH genes for the different *Bacteroidetes* MAGs, coloured according to the assigned GH family. The number of assigned GH families (i.e. GH diversity) is represented by a black solid line. (C) Relative metagenomic abundance of the different GHs additionally functionally assigned to an EC category and coloured according to the EC category. (D) Distribution of the assigned EC categories among the different *Bacteroidetes* MAGs, coloured according to the EC category and throughout the digestion experiment. The number of EC functional categories (i.e. EC diversity) is represented by a black solid line. (E) Percentage of genome completeness for the different *Bacteroidetes* MAGs.

Remark: Due to incompleteness of some *Bacteroidetes* MAGs, the diversity measurements for the different GH families (respectively EC categories) can be higher than shown on the respective graphs.

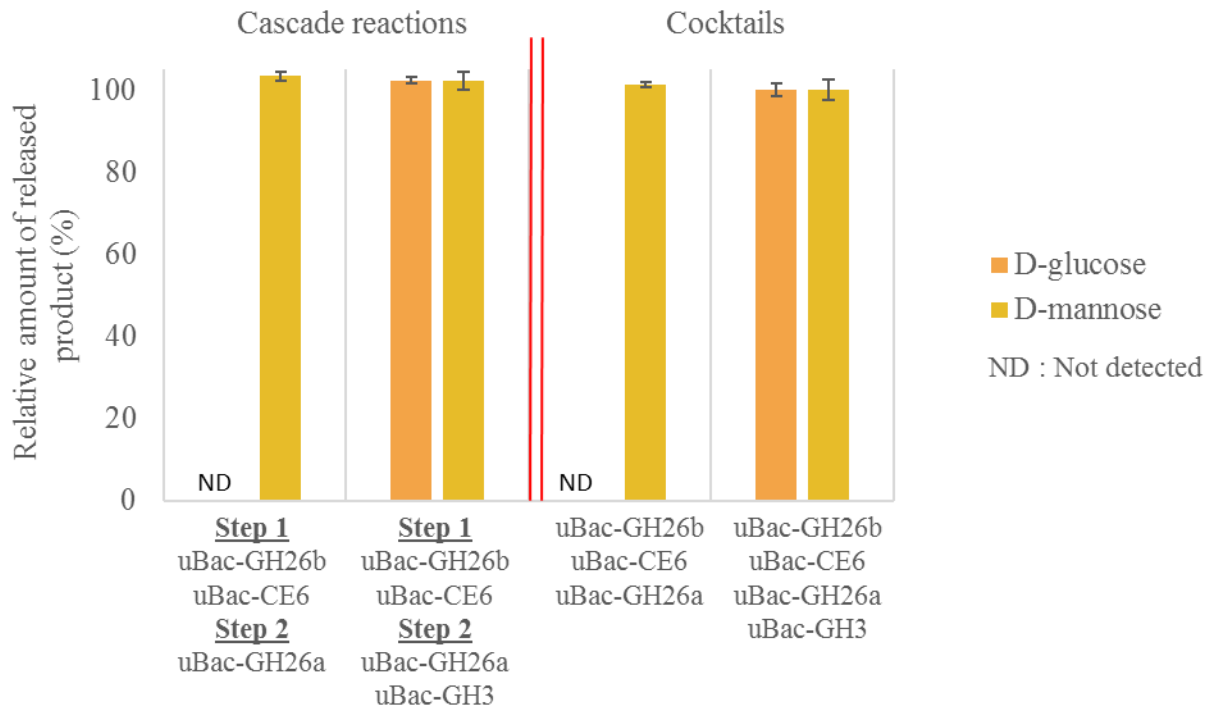

Fig. S3: Release of D-glucose and D-mannose after enzymatic hydrolysis of acetylated konjac glucomannan. Cascade reactions and cocktails were compared. Cascade reaction is defined as follow, first hydrolysis of the substrate (one hour at 37°C) by the enzymes specified in step 1, followed by a second hydrolysis (one hour at 37°C) by the enzyme(s) specified in step 2. Cocktail is defined as follow, enzymes were added and a single incubation step (one hour at 37°C) was performed in order to hydrolyse the substrate.

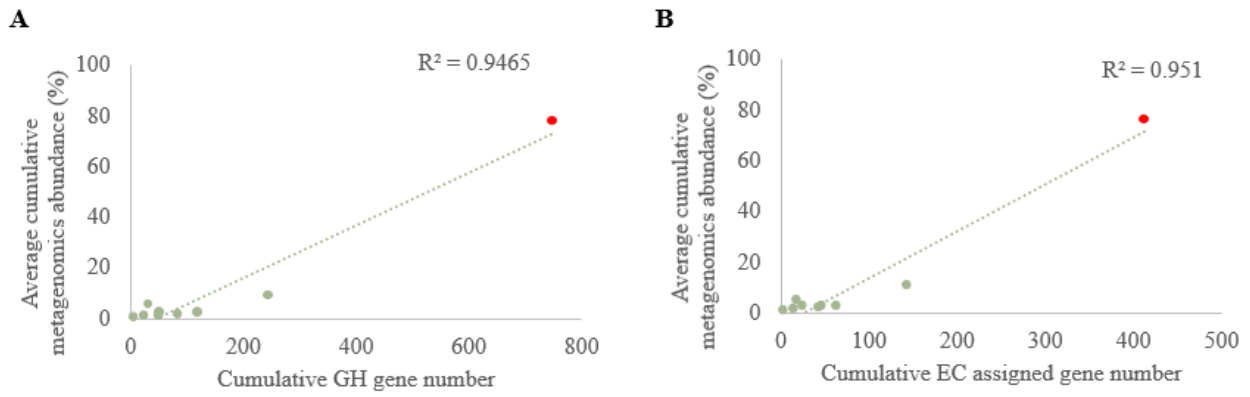

Fig. S4: Correlation between the average cumulative metagenomic abundance of MAGs represented at the phylum level and the cumulative number of their carbohydrate hydrolytic genes, shown at the GH family level (A) and further supported by the assigned EC category (B). *Bacteroidetes* phylum is represented by a red dot.

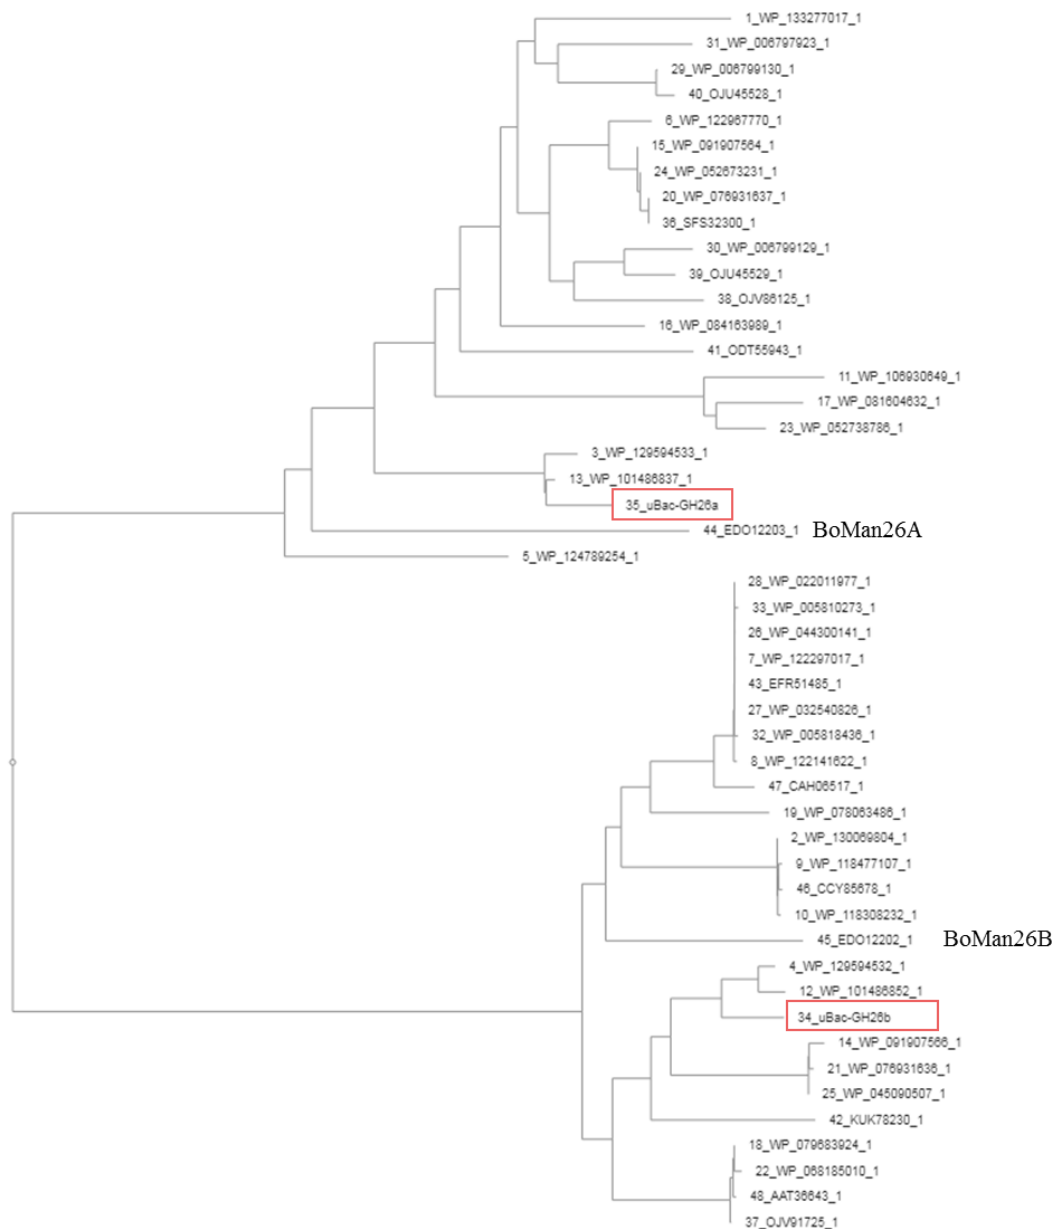

Fig. S5: uBac-GH26a and uBac-GH26b sequence similarities including mannanases from NCBI database. Sequence alignment and phylogenetic tree was generated using the MAFFT server <https://mafft.cbrc.jp/alignment/software>. BoMan26A and BoMan26B refers to two mannanases isolated from a galactomannan-targeting PUL (1). uBac-GH26a and uBac-GH26b are highlighted in red.

1. Bagenholm V, Reddy SK, Bouraoui H, Morrill J, Kulcinskaja E, Bahr CM, Aurelius O, Rogers T, Xiao Y, Logan DT, Martens EC, Koropatkin NM, Stalbrand H. 2017. Galactomannan catabolism conferred by a polysaccharide utilization locus of

Bacteroides ovatus: Enzyme synergy and crystal structure of a  $\beta$ -mannanase. J Biol Chem 292:229–243



Table S1: Analysis of the different MAGs

| Phylophlan                                                                     | MAG number | Proteins coding genes | sus-like genes | CAZys coding genes | % CAZys in the MAG | % Completeness | % Metagenomic abundance |
|--------------------------------------------------------------------------------|------------|-----------------------|----------------|--------------------|--------------------|----------------|-------------------------|
| Bacteria; Bacteroidetes                                                        | 2          | 2263                  | 97             | 222                | 9.8                | 96.6           | 6.3                     |
| Bacteria; Bacteroidetes; Bacteroidia; Bacteroidales                            | 8          | 1515                  | 41             | 151                | 10.0               | 82.9           | 8.8                     |
| Bacteria; Bacteroidetes; Bacteroidia; Bacteroidales; Rikenellaceae; Alistipes  | 11         | 1881                  | 29             | 151                | 8.0                | 85.9           | 1.2                     |
| Bacteria; Bacteroidetes; Bacteroidia; Bacteroidales                            | 15         | 1461                  | 23             | 135                | 9.1                | 81.6           | 12                      |
| Bacteria; Bacteroidetes; Bacteroidia; Bacteroidales; Rikenellaceae; Alistipes  | 17         | 1320                  | 25             | 62                 | 4.7                | 91.2           | 1.2                     |
| Bacteria; Bacteroidetes; Bacteroidia; Bacteroidales; Rikenellaceae; Alistipes  | 25         | 1276                  | 32             | 104                | 8.2                | 59             | 0.5                     |
| Bacteria; Bacteroidetes; Bacteroidia; Bacteroidales                            | 26         | 1237                  | 34             | 107                | 8.7                | 51.3           | 0.3                     |
| Bacteria; Bacteroidetes; Bacteroidia; Bacteroidales                            | 28         | 1726                  | 60             | 160                | 9.3                | 54.5           | 0.6                     |
| Bacteria; Bacteroidetes; Bacteroidia; Bacteroidales; Rikenellaceae; Alistipes  | 30         | 1914                  | 9              | 228                | 11.9               | 99.5           | 3.4                     |
| Bacteria; Firmicutes; Clostridia; Clostridiales                                | 3          | 1784                  | 0              | 73                 | 4.1                | 95.3           | 1.6                     |
| Bacteria; Firmicutes; Clostridia                                               | 4          | 2099                  | 1              | 89                 | 4.2                | 94.9           | 2.6                     |
| Bacteria; Firmicutes; Clostridia                                               | 12         | 2064                  | 0              | 74                 | 3.6                | 89.8           | 2.4                     |
| Bacteria; Firmicutes; Clostridia                                               | 16         | 1615                  | 0              | 74                 | 4.6                | 63.9           | 0.7                     |
| Bacteria; Firmicutes; Clostridia                                               | 20         | 1307                  | 1              | 45                 | 3.4                | 60.4           | 0.5                     |
| Bacteria; Firmicutes; Clostridia; Clostridiales                                | 22         | 1040                  | 0              | 58                 | 5.6                | 62.0           | 0.3                     |
| Bacteria; Firmicutes; Clostridia; Clostridiales                                | 23         | 1034                  | 0              | 43                 | 4.2                | 51.8           | 0.6                     |
| Bacteria; Firmicutes; Clostridia                                               | 27         | 1216                  | 0              | 27                 | 2.2                | 49.5           | 0.3                     |
| Bacteria; Cloacimonetes                                                        | 1          | 1250                  | 3              | 40                 | 3.2                | 98.9           | 22.3                    |
| Bacteria; Cloacimonetes                                                        | 13         | 1404                  | 2              | 62                 | 4.4                | 87.3           | 1.1                     |
| Bacteria; Cloacimonetes                                                        | 31         | 1443                  | 2              | 60                 | 4.2                | 95.6           | 1.7                     |
| Bacteria; Spirochaetes; Spirochaetes; Spirochaetales                           | 7          | 1945                  | 1              | 90                 | 4.6                | 66.7           | 1.1                     |
| Bacteria; Spirochaetes; Spirochaetes; Spirochaetales                           | 14         | 1889                  | 0              | 62                 | 3.3                | 83.8           | 0.8                     |
| Bacteria; Spirochaetes; Spirochaetes; Spirochaetales; Treponemaceae; Treponema | 18         | 1621                  | 0              | 47                 | 2.9                | 76.3           | 0.6                     |
| Bacteria; Synergistetes; Synergistia; Synergistales; Synergistaceae            | 5          | 1790                  | 1              | 68                 | 3.8                | 94.8           | 1.5                     |
| Bacteria; Synergistetes; Synergistia; Synergistales; Synergistaceae            | 9          | 1708                  | 2              | 44                 | 2.6                | 92.8           | 0.7                     |
| Bacteria; Synergistetes; Synergistia; Synergistales; Synergistaceae            | 10         | 1368                  | 2              | 29                 | 2.1                | 92.2           | 1                       |
| Bacteria; Lentisphaerae; Lentisphaerae                                         | 19         | 1736                  | 0              | 113                | 6.5                | 77.3           | 1.4                     |
| Bacteria; Planctomycetes; Planctomycetacia                                     | 21         | 1935                  | 6              | 171                | 8.8                | 65.5           | 0.6                     |
| Bacteria; Thermotogae; Thermotogae; Thermotogales; Thermotogaceae              | 24         | 1273                  | 0              | 78                 | 6.1                | 66.8           | 0.4                     |
| Archaea; Euryarchaeota; Methanomicrobia; Methanomicrobiales                    | 6          | 1447                  | 0              | 28                 | 1.9                | 92.2           | 1.5                     |

Table S2: Results of the enzymatic assays and EC number prediction

| Substrate type              | Substrate                     | Activity ( $10^{-3}$ U/mg $\pm$ SD) |                                         |                              |                                        |                             |                          |
|-----------------------------|-------------------------------|-------------------------------------|-----------------------------------------|------------------------------|----------------------------------------|-----------------------------|--------------------------|
|                             |                               | uBac-GH26a<br>EC.3.2.1.78*          | uBac-GH26b <sup>+</sup><br>EC.3.2.1.78* | uBac-GH130<br>EC. 2.4.1.281* | uBac-GH5 <sup>++</sup><br>EC. 3.2.1.4* | uBac-CE6 <sup>+</sup><br>NA | uBac-GH3<br>EC.3.2.1.37* |
| Polysaccharide              | Xylan                         | -                                   | -                                       | -                            | -                                      | -                           | -                        |
|                             | Galactomannan                 | 94.86 $\pm$ 6.08                    | 90.68 $\pm$ 5.28                        | -                            | -                                      | -                           | -                        |
|                             | Arabinoxylan                  | -                                   | -                                       | -                            | -                                      | -                           | -                        |
|                             | Carboxymethyl<br>cellulose    | -                                   | -                                       | -                            | 19.05 $\pm$ 0.51                       | -                           | -                        |
|                             | Glucomannan                   | 102.84 $\pm$ 1.06                   | 31.39 $\pm$ 1.52                        | -                            | -                                      | -                           | -                        |
| 4-Nitrophenyl               | $\alpha$ -D-mannopyranoside   | -                                   | -                                       | -                            | -                                      | -                           | -                        |
|                             | $\beta$ -D-glucopyranoside    | -                                   | -                                       | -                            | -                                      | -                           | 177.00 $\pm$ 7.52        |
|                             | $\beta$ -D-xylopyranoside     | -                                   | -                                       | -                            | -                                      | -                           | -                        |
|                             | $\beta$ -D-mannopyranoside    | -                                   | -                                       | -                            | -                                      | -                           | -                        |
|                             | $\alpha$ -L-arabinofuranoside | -                                   | -                                       | -                            | -                                      | -                           | -                        |
|                             | $\beta$ -D-cellobioside       | -                                   | -                                       | -                            | 9.94 $\pm$ 0.88                        | -                           | -                        |
|                             | $\alpha$ -D-galactopyranoside | -                                   | -                                       | -                            | -                                      | -                           | -                        |
|                             | acetate                       | -                                   | -                                       | -                            | -                                      | 30215.70 $\pm$ 0.20         | -                        |
| $\alpha$ -D-glucopyranoside | -                             | -                                   | -                                       | -                            | -                                      | -                           |                          |

Results are expressed in U/mg where one unit is defined as the amount of protein required to release one  $\mu$ mol of substrate per minute.

\* EC number prediction based on Hotpep analysis

NA: Not assigned

<sup>+</sup> Signal peptidase I and cleavage site predicted using LipoP v1.0 server

<sup>++</sup> Lipoprotein signal peptide II and cleavage site predicted using LipoP v1.0 server

Table S3: Concentrations of the substrates used for the enzymatic assays

| Substrate                                   | Stock concentration (mM) |
|---------------------------------------------|--------------------------|
| 4-nitrophenyl $\alpha$ -D-mannopyranoside   | 20                       |
| 4-nitrophenyl $\beta$ -D-glucopyranoside    | 40                       |
| 4-nitrophenyl $\beta$ -D-xylopyranoside     | 40                       |
| 4-nitrophenyl $\beta$ -D-mannopyranoside    | 20                       |
| 4-nitrophenyl $\alpha$ -L-arabinofuranoside | 20                       |
| 4-nitrophenyl $\beta$ -D-cellobioside       | 10                       |
| 4-nitrophenyl $\alpha$ -D-galactopyranoside | 40                       |
| 4-nitrophenyl acetate                       | 4                        |
| 4-nitrophenyl $\alpha$ -D-glucopyranoside   | 20                       |

  

| Substrate     | Stock concentration (g/L) |
|---------------|---------------------------|
| CMC           | 10                        |
| Arabinoxylan  | 12                        |
| Galactomannan | 8                         |
| Glucomannan   | 8                         |
| Xylan         | 18                        |

## Text S1: Genes selection, isolation and cloning

Following the bioinformatics analyses, genes of interest were identified and amplified by polymerase chain reaction (PCR), using a Veriti™ 96 wells Thermal cycler (Applied Biosystems, Foster City, USA). Amplicons were generated using the Q5 High-Fidelity Hot Start (New England Biolabs Inc., Ipswich, USA) and according to the thermal profile: initial denaturation was made at 98°C for 5 seconds, followed by annealing for 30 seconds with temperature depending on the melting temperature of the primers ( $T_m$ ), and the final extension was carried out at 72°C for 30 seconds. Thirty six cycles of PCR were performed. PCR products were purified using the PCR purification kit (Qiagen, Hilden, Germany) and concentrations were determined by NanoDrop 1000 Spectrometer (Thermofisher, Waltham, USA).

Genes were then cloned into pGem-t-easy vector using the respective kit (Promega, Madison, USA) followed by transformation of JM109 High Efficiency Competent Cells, allowing blue/white screening of colonies. Positive colonies were confirmed by a colony PCR and the respective plasmids from over-night cultures were purified using GeneJET Plasmid Miniprep Kit (Thermofisher, Waltham, USA). Correctly inserted genes (determined by sequencing) were selected for further expression.

## Text S2: Proteins identification

Recombinant proteins were identified after SDS-PAGE separation. The band at the expected molecular weight was cut from the gel and reduced with 100  $\mu$ L of 0.15% (w/v) D-Dithiothreitol (DDT) in 100 mM Ammonium bicarbonate (AmBic). After incubation at 56°C for 30 minutes, DDT was removed and 100  $\mu$ L of 1% (w/v) Iodoacetamide in 100 mM AmBic was added to the sample. Incubation was performed for 30 min at room temperature in the dark. Iodoacetamide was removed from the sample with two washes with 200  $\mu$ L 50 mM AmBic in ethanol. The gel pieces were dehydrated with 200  $\mu$ L of acetonitrile (ACN) and after removal of the liquid phase, the gel pieces were completely dried. The dried gel pieces were incubated at 37°C overnight in 8  $\mu$ L of trypsin (5ng/ $\mu$ L) and 15  $\mu$ L 50mM AmBic. The next day, the liquid phase containing the peptides was recovered in a clean vial and peptides were further extracted by two washes with 35  $\mu$ L 50% (v/v) ACN, 0.1% (v/v) Trifluoroacetic acid (TFA). The extracted peptides were dried under vacuum for 2 hours. Peptides were re-solubilized in 0.7  $\mu$ L 50% (v/v) ACN, 0.1% (v/v) TFA and spotted on a stainless steel OptiTOF 384 well plate (AB Sciex, Framingham, USA). 0.7  $\mu$ L of  $\alpha$ -Cyano-4-hydroxycinnamic acid (CHCA) matrix at 7mg/mL in 50% (v/v) ACN, 0.1% (v/v) TFA were added. Samples were analysed using the AB Sciex 5800 MALDI-TOF/TOF (Sciex, Framingham, USA), a MS spectrum was acquired and the ten most intense peaks, excluding known contaminants, were fragmented. Identification was performed using an in-house MASCOT server with a database containing the theoretical amino acid sequence of the recombinant proteins and standard settings (B. Printz, K. Sergeant, S. Lutts, C. Guignard, J. Renault, and JF. Hausman, J Proteome Res 12:5160–5179, 2013, doi:10.1021/pr400590d). Additional *de novo* sequencing was done to confirm the presence of any signal peptides.
